# Supplementary material
Source: PubMed Central journal article supplement (PMC5573626)
Supplement: NIHMS885509-supplement-supplement_1.pdf [file NIHMS885509-supplement-supplement_1.pdf]

**SUPPLEMENTAL MATERIAL:** Metabolomic determinants of metabolic risk in Mexican adolescents

Wei Perng<sup>1,2</sup>, Emily C. Hector<sup>3</sup>, Peter X.K. Song<sup>3</sup>, Martha Maria Tellez Rojo<sup>4</sup>, Sasha Raskind<sup>5</sup>, Maureen Kachman<sup>5</sup>, Alejandra Cantoral<sup>4</sup>, Charles F. Burant<sup>1,5,6</sup>, and Karen E. Peterson<sup>1,7</sup>

<sup>1</sup> Department of Nutritional Sciences, University of Michigan School of Public Health, Ann Arbor, MI, USA.

<sup>2</sup> Department of Epidemiology, University of Michigan School of Public Health, Ann Arbor, MI, USA.

<sup>3</sup> Department of Biostatistics, University of Michigan School of Public Health, Ann Arbor, MI, USA.

<sup>4</sup> Center for Research on Nutrition and Health, National Institute of Public Health, Cuernavaca, Morelos, México.

<sup>5</sup> Michigan Regional Comprehensive Metabolomics Resource Core, University of Michigan Medical School, Ann Arbor, MI, USA.

<sup>6</sup> Center for Computational Medicine and Bioinformatics, University of Michigan Medical School, Ann Arbor, MI, USA.

<sup>7</sup> Center for Human Growth and Development, University of Michigan, Ann Arbor, MI, USA.

**Correspondence:**

Wei Perng ([perngwei@umich.edu](mailto:perngwei@umich.edu))

1415 Washington Heights, Room 1860 SPH 1

Ann Arbor, MI 48109-2029

**Supplemental Table S1** Spearman correlations among components of MetRisk z-score

|                     | Waist<br>circumference | Glucose | C-peptide | Triglyceride:HDL | (SBP+DBP)/2 |
|---------------------|------------------------|---------|-----------|------------------|-------------|
| Waist circumference | 1.00                   |         |           |                  |             |
| Glucose             | 0.02                   | 1.00    |           |                  |             |
| C-peptide           | 0.60                   | 0.17    | 1.00      |                  |             |
| Triglyceride:HDL    | 0.39                   | 0.02    | 0.40      | 1.00             |             |
| (SBP + DBP)/2       | 0.53                   | -0.02   | 0.36      | 0.18             | 1.00        |

**SBP** - systolic blood pressure; **DBP** - diastolic blood pressure; **HDL** - high-density lipoprotein

**Supplemental Table S2** Sex-specific associations of metabolites with pubertal status components among 238 ELEMENT adolescents.<sup>a</sup>

|                                                        | Pre-pubertal  | Pubertal     | $\beta$ (95% CI)<br>Pubertal vs.<br>Pre-pubertal | P-value |
|--------------------------------------------------------|---------------|--------------|--------------------------------------------------|---------|
|                                                        | <i>cm</i>     | <i>mg/dL</i> | <i>ng/mL</i>                                     |         |
| <b>Girls (n = 125)</b>                                 |               |              |                                                  |         |
| <i>Metabolites identified via data-driven approach</i> |               |              |                                                  |         |
| Diacylglycerol 16:/16:0                                | -0.05 ± 1.08  | 0.32 ± 0.89  | 0.37 (0.00, 0.75)                                | 0.05    |
| 1,3-dielaidin                                          | 0.09 ± 0.98   | 0.25 ± 1.11  | 0.16 (-0.22, 0.53)                               | 0.42    |
| Myo-inositol                                           | -0.18 ± 1.091 | -0.01 ± 1.02 | 0.17 (-0.20, 0.54)                               | 0.37    |
| Urate                                                  | -0.16 ± 0.96  | 0.17 ± 0.94  | 0.33 (-0.02, 0.68)                               | 0.06    |
| Thymine                                                | 0.01 ± 1.04   | 0.24 ± 0.81  | 0.23 (-0.12, 0.58)                               | 0.21    |
| Dodecenedioic acid                                     | -0.12 ± 0.99  | -0.05 ± 1.19 | 0.06 (-0.32, 0.46)                               | 0.72    |
| N-acetylglycine                                        | -0.07 ± 0.95  | 0.37 ± 0.86  | 0.44 (0.10, 0.78)                                | 0.01    |
| <i>Branched chain amino acids</i>                      |               |              |                                                  |         |
| Leucine                                                | -0.02 ± 0.93  | 0.15 ± 0.88  | 0.18 (-0.16, 0.51)                               | 0.30    |
| Isoleucine                                             | -0.15 ± 0.94  | 0.24 ± 0.87  | 0.39 (0.05, 0.73)                                | 0.02    |
| Valine                                                 | -0.03 ± 1.00  | 0.23 ± 0.78  | 0.26 (-0.08, 0.60)                               | 0.13    |
| <b>Boys (n = 113)</b>                                  |               |              |                                                  |         |
| <i>Metabolites identified via data-driven approach</i> |               |              |                                                  |         |
| Diacylglycerol 16:/16:0                                | -0.16 ± 1.04  | 0.03 ± 0.89  | 0.19 (-0.17, 0.55)                               | 0.30    |
| Tyrosine                                               | 0.10 ± 1.06   | 0.12 ± 0.97  | 0.03 (-0.35, 0.41)                               | 0.89    |
| 5'-methylthioadenosine                                 | 0.21 ± 0.87   | -0.15 ± 1.07 | -0.35 (-0.72, 0.01)                              | 0.06    |
| <i>Branched chain amino acids</i>                      |               |              |                                                  |         |
| Leucine                                                | -0.13 ± 1.01  | 0.13 ± 1.15  | 0.26 (-0.14, 0.66)                               | 0.21    |
| Isoleucine                                             | -0.03 ± 1.05  | 0.15 ± 1.07  | 0.18 (-0.21, 0.58)                               | 0.37    |
| Valine                                                 | -0.20 ± 0.96  | 0.12 ± 1.13  | 0.32 (-0.07, 0.71)                               | 0.11    |

**a** Puberty was defined as Tanner stage 2-5 (vs. 1) for breast (girls), testicular (boys), and pubic hair (both) development.
